# Supplementary material for: Adipose-derived mesenchymal stem cells inhibit cell proliferation and migration and suppress extracellular matrix synthesis in hypertrophic-scar and keloid fibroblasts
Source: PubMed Central journal article supplement — Exp Ther Med. 2020 Dec 14;21(2):139. doi: 10.3892/etm.2020.9571 (PMC7791925; doi:10.3892/etm.2020.9571), 2020-12-14

Figure S1. Identification of ADSCs by flow cytometry. (A) Statistics of different surface antigen-positive cells by detecting cell-surface antigen of (B) CD29, (C) CD44, (D) CD105, (E) CD45, (F) CD34 and (G) CD31. Red traces indicates negative control for antibody, and blue traces indicates positive staining. ADSCs, adipose-derived mesenchymal stem cells; CD, cluster of differentiation.

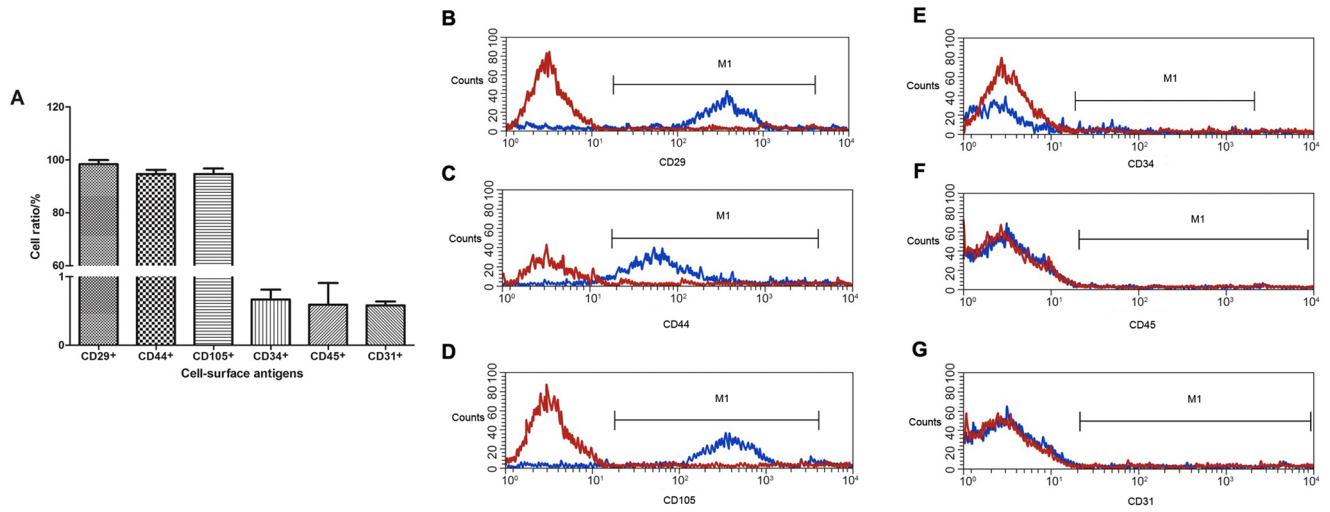

Supplement: Supplementary_Data.pdf [file Supplementary_Data.pdf]
